# Supplementary material for: The DNA methylation-regulated MCTP1 activates the drug-resistance of esophageal cancer cells
Source: publisher site journal article supplement (doi:10.18632/aging.104173), 2021-02-11
Supplement: Supplementary file [file aging-v13i3-104173-supplementary-material-SD1.pdf]

## SUPPLEMENTARY FIGURE

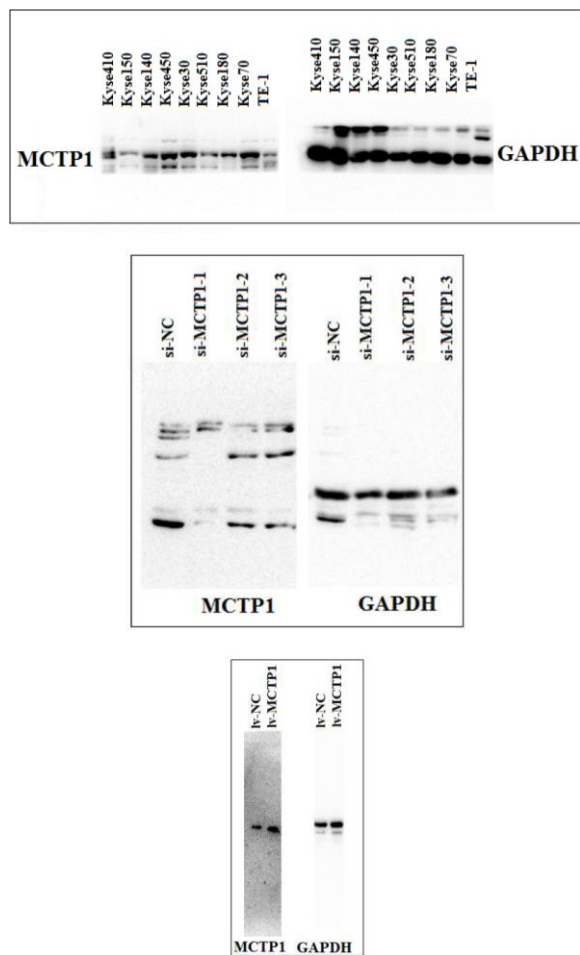

**Supplementary Figure 1. The full-length gels of the Figure 3C western analyses used in the revised manuscript.** The full-length gels of the Figure 3E western analyses used in the revised manuscript. The full-length gels of the Figure 4D western analyses used in the revised manuscript.
